## Independent predictors of heart failure in patients with type 2 diabetes and chronic kidney disease: modeling from the CREDENCE trial

K.W. Mahaffey<sup>1</sup>, J. Li<sup>2</sup>, T.I. Chang<sup>1</sup>, A. Sarraju<sup>1</sup>, R. Agarwal<sup>3</sup>, D.M. Charytan<sup>4</sup>, T. Greene<sup>5</sup>, H.J.L. Heerspink<sup>6</sup>, A. Levin<sup>7</sup>, B. Neal<sup>2</sup>, C. Pollock<sup>8</sup>, Y. Yavin<sup>9</sup>, M. Jardine<sup>2</sup>, V. Perkovic<sup>2</sup>, C.P. Cannon<sup>10</sup>

<sup>1</sup>Stanford Center for Clinical Research, Dept of Medicine, Stanford University School of Medicine, Stanford, CA, United States of America; <sup>2</sup>The George Institute for Global Health, UNSW Sydney, Sydney, Australia; <sup>3</sup>Indiana University School of Medicine and VA Medical Center, Indianapolis, IN, United States of America; <sup>4</sup>Nephrology Division, NYU School of Medicine and NYU Langone Medical Center, New York, NY, United States of America; <sup>5</sup>Division of Biostatistics, Department of Population Health Sciences, University of Utah, Salt Lake City, UT, United States of America; <sup>6</sup>Department of Clinical Pharmacy and Pharmacology, University of Groningen, University Medical Center Groningen, Groningen, Netherlands (The); <sup>7</sup>Division of Nephrology, University of British Columbia, Vancouver, BC, Canada; <sup>8</sup>Kolling Institute of Medical Research, Sydney Medical School, University of Sydney, Royal North Shore Hospital, St Leonards, NSW, Australia; <sup>9</sup>Janssen Research & Development, LLC, Raritan, NJ, United States of America; <sup>10</sup>Cardiovascular Division, Brigham & Women's Hospital and Baim Institute for Clinical Research, Boston, MA, United States of America

**Funding Acknowledgement:** Type of funding source: Private company. Main funding source(s): Janssen Research & Development, LLC

**Background:** SGLT2 inhibitors have been shown to reduce hospitalization for heart failure (HHF). We sought to determine independent baseline predictors for HHF specifically in a population with type 2 diabetes and chronic kidney disease (CKD).

**Methods:** CREDENCE randomized 4401 participants with type 2 diabetes and CKD to canagliflozin 100 mg versus placebo. We evaluated the baseline clinical and demographic factors using multivariate regression modeling to identify the independent predictors of HHF.

**Results:** Overall, 230 participants (89 canagliflozin; 141 placebo) had at least 1 HHF event. Canagliflozin reduced the incidence of HHF compared with placebo (4.0% vs 6.4%; HR 0.61; 95% CI 0.47–0.80). Participants

with HHF events postrandomization were older (65.8 vs 62.9 y), and had a longer duration of diabetes (17.4 vs 15.7 y), higher prevalence of prior HF (30.4% vs 14.0%), higher urinary albumin:creatinine ratio (1347 vs 904 mg/g), lower estimated glomerular filtration rate (51.5 vs 56.4 mL/min/1.73m<sup>2</sup>), and higher prevalence of prior cardiovascular disease (65.7% vs 49.6%) compared to those without HHF. Independent predictors of HHF are shown in the Table.

**Conclusions:** HHF is common in patients with type 2 diabetes and CKD. Canagliflozin reduces HHF by 39% compared with placebo. Higher urinary albumin:creatinine ratio was the most potent predictor of HHF and should be part of patient risk assessment.

Table 1. Baseline Predictors of HHF\*

| Parameter                                      | Chi-square | HR (95% CI)       | P value |
|------------------------------------------------|------------|-------------------|---------|
| Log UACR (1 unit increase)                     | 36.0       | 2.95 (2.07, 4.21) | <0.001  |
| Age (1 year increase)                          | 17.0       | 1.04 (1.02, 1.06) | <0.001  |
| Prior heart failure (Yes/No)                   | 16.7       | 1.93 (1.41, 2.65) | <0.001  |
| Loop diuretic (Yes/No)                         | 9.6        | 1.79 (1.24, 2.57) | 0.002   |
| Peripheral arterial disease (Yes/No)           | 8.5        | 1.71 (1.19, 2.45) | 0.004   |
| Diastolic BP (1 mmHg increase)                 | 6.7        | 0.98 (0.97, 1.00) | 0.01    |
| Glycated hemoglobin (1% increase)              | 6.5        | 1.14 (1.03, 1.27) | 0.01    |
| Insulin (Yes/No)                               | 5.9        | 1.56 (1.09, 2.22) | 0.02    |
| Prior myocardial infarction (Yes/No)           | 4.9        | 1.58 (1.05, 2.36) | 0.03    |
| Body mass index (1 kg/m <sup>2</sup> increase) | 4.2        | 1.02 (1.00, 1.04) | 0.04    |
| Randomization to canagliflozin (vs. placebo)   | 12.9       | 0.61 (0.47–0.80)  | <0.001  |

UACR, urinary albumin:creatinine ratio; BP, blood pressure. \*Multivariate models adjusted for randomization.
